# Supplementary material for: Effects of immersive virtual reality therapy on intravenous patient-controlled sedation during orthopaedic surgery under regional anesthesia: A randomized controlled trial
Source: PLoS One. 2020 Feb 24;15(2):e0229320. doi: 10.1371/journal.pone.0229320 (PMC7039521; doi:10.1371/journal.pone.0229320)
Supplement: S1 Data — (XLSX) [file pone.0229320.s003.xlsx]

## Sheet: Results
Date	ID	Age	Gender (0F, 1M)	Height	Weight	BMI	VR (0 control, 1 VR)	Midaz Premed (1 yes, 0 no)	Fent Premed	Any premed	Program (0 control, 1 Eden, 2 Iceland)	Procedure (0 TKR, 1 THJR, 2 Ant. THR, 3 Hip Hemi, 4 PFJ)	Position (0 supine, 1 lateral)	Duration	Duration if early VR removal	Midaz Pre	Midaz Case	Fent Pre	Fent Case	PCA dose	Prop PCA Doses Hour 1	Prop PCA Doses Hour 2	Prop PCA Doses Hour 3	Prop PCA Doses Hour 4	Prop given by anaes	Prop Total	Prop/hour	Unmet Demand Hour 1	Unmet Demand Hour 2	Unmet Demand Hour 3	Unmet Demand Hour 4	Total Unmet Demand	CS Before	CS After (no sleep = 1)	CS Change	Sleep Score After (Blank N/A)	CS Before not inc. sleep	CS After not inc. sleep	CS Change not inc. sleep	Em Before	Em After	Em Change	Sx Before	Sx After	Sx Change	EmB Before	EmB After	EmB Change	Conf Before
2016-04-14	1	70-79	1	160	75	29.2969	0	1	0	1	0	1	1	135		5	0	0	0	24	2	0	0			48	21.3333	4	0	0		4	12	15	3	5	10	10	0	12	15	3	8	8	0	7	5	-2	1
2016-04-15	2	60-69	1	177	86	27.4506	0	1	0	1	0	1	1	135		3	0	0	0	30	0	0	0			0	0	0	0	0		0	14	11	-3		9	10	1	15	15	0	8	8	0	7	5	-2	1
2016-04-01	3	70-79	1	168	109	38.6196	0	1	1	1	0	0	0	120		2	0	50	0	27	0	0	0			0	0	0	0	0		0	14	11	-3		10	10	0	14	15	1	10	8	-2	5	5	0	1
2016-03-24	4	70-79	0	161	98	37.8072	0	0	0	0	0	0	0	115		0	0	0	0	20	6	3				180	93.913						9	11	2	1	8	10	2	11	15	4	8	8	0	5	5	0	2
2016-03-24	5	70-79	1	172	85	28.7317	0	0	0	0	0	1	1	140		0	0	0	0	30	0	0	0			0	0	0	0	0		0	15	11	-4	1	10	10	0	14	14	0	8	8	0	5	5	0	1
2016-03-24	6	60-69	1	168	77.6	27.4943	0	0	0	0	0	1	1	135		0	0	0	0	25	1	0	0			25	11.1111	0	0	0		0	9	14	5	4	7	10	3	13	15	2	10	11	1	8	5	-3	1
2016-02-24	7	50-59	1	174	115	37.9839	0	1	0	1	0	1	1	85		5	0	0	0	30	1	0				30	21.1765	0	0			0	9	7	-2	1	7	6	-1	7	11	4	10	15	5	5	5	0	2
2016-02-11	8	60-69	0	151	110	48.2435	0	0	0	0	0	0	0	135		0	0	0	0	30	2	1	0			90	40						10	13	3	3	8	10	2	12	13	1	8	10	2	5	5	0	1
2016-02-10	9	60-69	0	162	124	47.2489	0	1	1	1	0	1	1	150		1.5	0	50	0	30	6	5	1			360	144						12	15	3	5	9	10	1	12	13	1	12	10	-2	11	6	-5	1
2016-02-29	10	60-69	0	151	93	40.7877	0	1	1	1	0	0	0	130		2	0	100	0	20	1	0	0			20	9.23077	0	0	0		0	15	11	-4	2	10	9	-1	6	13	7	8	10	2	8	5	-3	1
2016-03-01	11	80-89	0	155	72	29.9688	0	1	0	1	0	1	1	100		1	0	0	0	20	5	2				140	84						11	7	-4	1	7	6	-1	14	9	-5	8	10	2	8	5	-3	4
2016-03-08	12	60-69	0	155.5	72.3	29.9004	0	1	0	1	0	1	1	90		3	0	0	0	20	9	3				240	160						13	15	2	5	10	10	0	15	15	0	8	8	0	5	5	0	1
2016-03-21	13	50-59	0	152	73	31.5963	0	1	0	1	0	2	0	110		1	1	0	0	20	2	2				80	43.6364	0	0			0	10	13	3	5	7	8	1	11	14	3	13	9	-4	7	5	-2	1
2016-04-22	14	60-69	0	171	107.9	36.9002	0	1	1	1	0	1	1	150		4	0	55	0	24	2	1	3			144	57.6	1	0	4		5	14	15	1	5	10	10	0	13	15	2	9	8	-1	8	5	-3	1
2016-04-21	15	80-89	1	158.5	80	31.8443	0	1	1	1	0	0	0	125		2	0	25	0	26	6	4	0			260	124.8						15	15	0	5	10	10	0	15	15	0	8	8	0	6	5	-1	1
2016-04-21	16	70-79	0	150	58	25.7778	0	0	0	0	0	1	1	150		0	0	0	0	20	3	0	0			60	24	1	0	0		1	8	10	2		6	9	3	10	12	2	11	8	-3	7	5	-2	1
2016-05-10	17	70-79	1	184	80.5	23.7772	0	1	1	1	0	0	0	140		1.5	0	50	0	30	1	2	0			90	38.5714	0	0	0		0	15	15	0	5	10	10	0	15	15	0	8	8	0	5	5	0	1
2016-05-23	18	60-69	1	180	80	24.6914	0	0	0	0	0	1	1	180		0	0	0	0	30	2	2	6			300	100	1	0	3		4	14	13	-1	5	10	8	-2	15	15	0	8	8	0	5	5	0	1
2016-05-12	19	70-79	0	158	59	23.634	0	1	1	1	0	1	1	120		1.5	1.5	25	25	20	2	1				60	30	3	0			3	11	9	-2	3	8	6	-2	9	11	2	7	7	0	7	5	-2	1
2016-05-12	20	60-69	1	172	98	33.126	0	1	1	1	0	0	0	70		2	0	50	0	29	1	1				58	49.7143	5	6			11	15	15	0	5	10	10	0	15	15	0	7	7	0	5	5	0	1
2016-04-22	21	60-69	0	161	102	39.3503	1	1	0	1	1	0	0	130		2	0	0	0	20	0	0	0			0	0	0	0	0		0	13	15	2	5	9	10	1	15	15	0	8	8	0	7	5	-2	1
2016-04-08	22	60-69	0	144.5	76.5	36.6375	1	1	1	1	2	1	1	140		2.5	0	50	0	20	2	6	3			220	94.2857	2	6	0		8	14	14	0	5	9	9	0	13	15	2	9	8	-1	8	5	-3	1
2016-04-08	23	50-59	0	154	87.4	36.8528	1	1	0	1	1	2	0	105		1.5	0	0	0	20	0	0	0			0	0	0	0	0		0	11	10	-1	3	8	7	-1	13	4	-9	9	13	4	9	6	-3	1
2016-04-13	24	50-59	1	165.5	124	45.2716	1	1	0	1	2	1	1	225		2.5	0	0	25	26	5	5	4	3		442	117.867	9	39	10	13	71	15	15	0	5	10	10	0	14	15	1	8	8	0	12	5	-7	1
2016-04-19	25	60-69	0	158.5	70.5	28.0628	1	1	0	1	2	1	1	115		3	0	0	0	20	0	0				0	0	0	0			0	15	15	0	5	10	10	0	15	15	0	8	8	0	5	5	0	1
2016-04-07	26	50-59	1	180	82	25.3086	1	0	0	0	1	0	0	140	30	0	0	0	0	30	1	0	0			30	12.8571	0	0	0		0	14	13	-1	4	9	9	0	14	15	1	8	8	0	7	5	-2	1
2016-04-07	27	40-49	1	175	82	26.7755	1	0	0	0	1	2	0	120		0	0	0	0	30	2	0				60	30	0	0			0	12	11	-1		9	10	1	14	15	1	8	8	0	6	7	1	1
2016-04-06	28	50-59	1	169	97.9	34.2775	1	1	0	1	2	1	1	120	30	4	0	0	0	28	4	0				112	56	0	0			0	11	15	4	5	8	10	2	13	15	2	8	8	0	5	5	0	1
2016-03-22	29	60-69	1	162	112	42.6764	1	0	1	1	2	1	1	140	120	0	0	25	0	25	3	3	0			150	64.2857	0	0	0		0	13	13	0	4	9	9	0	13	12	-1	8	8	0	6	7	1	1
2016-03-22	30	20-29	1	174	100	33.0295	1	1	0	1	2	3	1	110	85	3	0	0	50	30	2	3				150	81.8182	0	0			0	14	15	1	5	10	10	0	14	11	-3	12	11	-1	7	5	-2	1
2016-02-22	31	50-59	0	169	137.7	48.2126	1	1	1	1	1	0	0	170	2	2	0	100	0	30	0	0	0			0	0	0	0	0		0	11	11	0	1	10	10	0	14	13	-1	9	11	2	7	5	-2	1
2016-02-11	32	50-59	0	167	125	44.8205	1	1	1	1	1	0	0	110		5	0	100	0	30	4	2				180	98.1818	0	0			0	6	12	6	4	4	8	4	6	9	3	15	14	-1	20	5	-15	1
2016-02-10	33	90-99	1	187	99	28.3108	1	1	1	1	1	0	0	135		1.5	0	50	0	30	2	3				150	66.6667	0	0			0	14	15	1	5	10	10	0	15	15	0	8	8	0	9	5	-4	1
2016-03-01	34	60-69	1	173	78	26.0617	1	1	1	1	1	0	0	110		2	0	50	0	30	0	0				0	0	0	0			0	13	15	2	5	9	10	1	15	15	0	10	10	0	7	5	-2	1
2016-03-01	35	60-69	0	158	84	33.6485	1	1	1	1	1	0	0	125		2	0	50	0	20	5	5	0			200	96						13	15	2	5	8	10	2	14	15	1	12	10	-2	9	7	-2	1
2016-03-02	36	80-89	1	160	73	28.5156	1	1	1	1	2	1	1	90		2	0	25	0	25	1	1				50	33.3333	0	0			0	13	15	2	5	10	10	0	15	15	0	9	10	1	5	5	0	1
2016-03-17	37	70-79	0	153	85	36.3108	1	1	1	1	2	1	1	120	105	2.5	0	50	0	20	6	9				300	150						10	15	5	5	8	10	2	15	15	0	11	9	-2	10	5	-5	1
2016-03-21	38	60-69	0	163.5	69.9	26.1482	1	1	1	1	2	2	0	60		5	0	75	0	20	0					0	0	0				0	13	9	-4		9	8	-1	8	11	3	9	9	0	7	7	0	1
2016-04-28	39	60-69	0	155	65	27.0552	1	1	1	1	2	1	1	160	45	3	2	50	25	20	0	3	3			120	45	1	7	0		8	13	11	-2		8	10	2	14	15	1	12	8	-4	10	5	-5	1
2016-05-09	40	60-69	0	157	86	34.8899	1	1	1	1	1	0	0	160		3	0	100	0	20	0	0	0		6	6	2.25	0	0	0		0	13	11	-2		8	10	2	10	12	2	8	9	1	6	5	-1	1
2016-05-23	41	60-69	1	189	93	26.0351	1	1	1	1	2	2	0	60	15	1.5	0	25	25	30	4					120	120	4				4	14	11	-3		10	10	0	13	11	-2	8	9	1	6	5	-1	1
2016-05-25	42	70-79	0	155.5	57.5	23.7797	1	1	1	1	1	0	0	85		2	0	50	0	20	1	0				20	14.1176	4	0			4	9	15	6	5	7	10	3	15	15	0	8	8	0	5	5	0	1
2016-05-25	43	70-79	1	178	95	29.9836	0	1	0	1	0	0	0	115		2	0	0	0	30	3	3				180	93.913	1	1			2	9	11	2	1	8	10	2	14	15	1	9	8	-1	5	5	0	1
2016-05-26	44	70-79	1	170	107	37.0242	1	1	0	1	2	1	1	110	80	2	0	0	100	30	4	4				240	130.909	4	4			8	14	14	0	4	9	10	1	13	11	-2	9	8	-1	5	5	0	1
2016-05-26	45	70-79	0	158	63.5	25.4366	0	1	1	1	0	1	1	150		1.5	0	50	0	20	4	6	1			220	88	1	3	1		5	10	13	3	5	8	8	0	9	10	1	10	9	-1	10	5	-5	1
2016-05-26	46	70-79	1	165	80	29.3848	0	1	0	1	0	0	0	115		3	0	0	0	26	0	0				0	0	0	0			0	13	10	-3		9	9	0	12	12	0	8	8	0	6	5	-1	1
2016-05-26	47	60-69	0	164	83.5	31.0455	0	1	1	1	0	4	0	65		1	0	100	0	22	5	0				110	101.538	4	0			4	11	13	2	4	8	9	1	10	13	3	8	8	0	8	5	-3	1
2016-05-31	48	60-69	0	156.6	72	29.3595	1	1	0	1	1	0	0	95		3	0	0	0	20	0	0				0	0	0	0			0	11	15	4	5	10	10	0	4	15	11	8	8	0	9	5	-4	1
2016-05-31	49	70-79	1	176	93	30.0232	1	1	0	1	1	0	0	95		4	0	0	0	30	5	0				150	94.7368	15	0			15	13	15	2	5	9	10	1	13	15	2	8	8	0	6	5	-1	1
2016-06-02	50	70-79	1	172	76.8	25.96	0	1	0	1	0	1	1	155		2	0	0	0	29	0	0	0			0	0	0	0	0		0	13	11	-2		10	10	0	15	15	0	11	8	-3	7	5	-2	1
																																		MedianC	0			MedianC	0		MedianC	1		MedianC	0		MedianC	-2
																																		MedianVR	1			MedianVR	0		MedianVR	1		MedianVR	0		MedianVR	-2
[truncated: 10 more columns]

## Sheet: Sheet1
VR (Control control, VR distraction VR)	Prop/hour
Control	21.3333
Control	0
Control	0
Control	93.913
Control	0
Control	11.1111
Control	21.1765
Control	40
Control	144
Control	9.23077
Control	84
Control	160
Control	43.6364
Control	57.6
Control	124.8
Control	24
Control	38.5714
Control	100
Control	30
Control	49.7143
VR distraction	0
VR distraction	94.2857
VR distraction	0
VR distraction	117.867
VR distraction	0
VR distraction	12.8571
VR distraction	30
VR distraction	56
VR distraction	64.2857
VR distraction	81.8182
VR distraction	0
VR distraction	98.1818
VR distraction	66.6667
VR distraction	0
VR distraction	96
VR distraction	33.3333
VR distraction	150
VR distraction	0
VR distraction	45
VR distraction	2.25
VR distraction	120
VR distraction	14.1176
Control	93.913
VR distraction	130.909
Control	88
Control	0
Control	101.538
VR distraction	0
VR distraction	94.7368
Control	0

## Sheet: Data dictionary
VR (0 control, 1 VR)	Control uses patient-controlled sedation with propofol, not wearing VR glasses. VR group watches virtual environment in VR glasses, in addition to PCS
Midaz Premed	Yes or no midazolam in anaesthetic room before procedure
Fent Premed	Yes or no fentanyl in anaesthetic room before procedure
Any premed	Yes or no fentanyl or midazolam before procedure
Program	VR program. Most supine position procedures watched Eden River (floating down river). Lateral position cases watched Iceland (wandering through mountains/iceland/rivers).
	More portable and convenient setup using EdenRiver in supine position. This program was not compatible with lateral position, which therefore used Iceland setup.
Procedure	Total knee replacement (supine position). Total hip replacement (lateral position). Anterior total hip replacement (supine position). Hip hemiarthroplasty (lateral position)
Position	Supine or lateral position.
Duration	Duration of PCS use. Start time typically once patient was moved to operating room and positioned.
	Generally the same time as VR use, though this differed if patients removed VR early, but continued PCS use
	This sometimes included up to 30 minutes before surgery started while surgeons prepared.
Duration if early VR removal	Duration of VR use if early removal. If empty, same as PCS duration
Midaz Pre	Midazolam dose before procedure
Midaz Case	Midazolam dose during case
Fent Pre	Fentanyl dose before procedure
Fent Case	Fentanyl dose during case
PCA dose	Propofol dose per PCS button press. Ideal body weight x 0.4mg/kg (IBW for males = height - 100. For females = height - 110)
Prop PCA Doses Hour 1	Number of PCS doses 0-60min
Prop PCA Doses Hour 2	Number of PCS doses 60-120
Prop PCA Doses Hour 3	Number of PCS doses 120-180
Prop PCA Doses Hour 4	Number of PCS doses 180-240
Prop given by anaes	Additional propofol given during case by anaesthetist
Prop Total	Total propofol dose
Prop/hour	Propofol per hour
Unmet Demand Hour 1	Number of PCS doses requested within 5 minute lockout period 0-60min
Unmet Demand Hour 2	60-120
Unmet Demand Hour 3	120-180
Unmet Demand Hour 4	180-240
Total Unmet Demand	Total number of PCS doses requested within 5 minute lockout period.
Survey scores	The following are results from quality of recovery survey. Answers are 1-5, 1=never 5=all the time. Before scored asked in reference to the last week. After scores asked in relation to during procedure.
CS Before	Comfort score before (Breathing easily, having a good sleep, feeling rested) /15
CS After (no sleep = 1)	Many patients stated they didn't sleep during procedure. I created two CS results, one where no sleep = 1, and one not including sleep as a score.
CS Change	Comfort score change including sleep score
Sleep Score After (Blank N/A)	Noting down specific sleep score. Blank if didn't sleep during procedure
CS Before not inc. sleep	Comfort score before not including sleep
CS After not inc. sleep	Comfort score after not including sleep
CS Change not inc. sleep	Comfort score change not including sleep score
Em Before	Emotion score (Feeling of general wellbeing, Feeling of being in control, Feeling comfortable) /15
Em After	Emotion score after
Em Change	Change in emotion score
Sx Before	Symptom score (Nausea, Vomiting, Dry Retching, Feeling Restless, Shaking or twitching, Shivering, Feeling too cold, Dizzy) /40
Sx After	Symptom score after
Sx Change	Change in symptom score
EmB Before	Emotion (B) score (Bad Dreams, Anxious, Angry, Depressed, Alone) /25
EmB After	Emotion (B) score after
EmB Change	Change in Emotion (B) score
Conf Before	Feeling confused before /5
Conf After	Feeling confused after
Conf Change	Change in confusion score
Pain Before	Pain score (Moderate pain, Severe pain, Headache, Muscle Pain, Backache, Sore throat, Sore mouth) /35
Pain After	Pain score after
Pain Change	Change in pain score
Overall Satisfied?	Overall, were you satisfied with the experience using the PCS (and VR goggles)
PCA Again?	Would you use the PCS again?
VR Again?	Would you use the VR goggles again?
Comments	Any general comments about the experience?
