# Supplementary material for: Effects of immersive virtual reality therapy on intravenous patient-controlled sedation during orthopaedic surgery under regional anesthesia: A randomized controlled trial
Source: PLOS journal article supplement (doi:10.1371/journal.pone.0229320), 2020-02-24
Supplement: S4 (10.1371/journal.pone.0229320.s004) [file journal.pone.0229320.s004]

**S1 Appendix: Datasheet with modified QoR-40**

Name: \_\_\_\_\_ UR#: \_\_\_\_\_ Age: \_\_\_\_\_ Gender: \_\_\_\_\_

Procedure: \_\_\_\_\_

Propofol use hour 1 \_\_\_\_\_ Demands Hour 1 \_\_\_\_\_

Propofol use hour 2 \_\_\_\_\_ Demands Hour 2 \_\_\_\_\_

Propofol use hour 3 \_\_\_\_\_ Demands Hour 3 \_\_\_\_\_

Total Propofol use \_\_\_\_\_ Total Demands \_\_\_\_\_

Other sedatives used \_\_\_\_\_

Obstruction/Apnoea during case Y/N

|                                                  | Start | End |
|--------------------------------------------------|-------|-----|
| <b>Comfort 1-5 (1 = never, 5 = all the time)</b> |       |     |
| Able to breathe easily                           |       |     |
| Have had a good sleep                            |       |     |
| Feel rested                                      |       |     |
| <b>Emotions</b>                                  |       |     |
| Feeling of general well-being                    |       |     |
| Feeling in control                               |       |     |
| Feeling comfortable                              |       |     |
| <b>Comfort/Symptoms</b>                          |       |     |
| Nausea                                           |       |     |
| Vomiting                                         |       |     |
| Dry-retching                                     |       |     |
| Feeling restless                                 |       |     |
| Shaking or twitching                             |       |     |
| Shivering                                        |       |     |
| Feeling too cold                                 |       |     |
| Feeling dizzy                                    |       |     |
| <b>Emotions (B)</b>                              |       |     |
| Bad dreams                                       |       |     |
| Anxious                                          |       |     |
| Angry                                            |       |     |
| Depressed                                        |       |     |
| Alone                                            |       |     |
| <b>Patient Support</b>                           |       |     |
| Confused                                         |       |     |
| <b>Pain</b>                                      |       |     |
| Moderate Pain                                    |       |     |
| Severe Pain                                      |       |     |
| Headache                                         |       |     |
| Muscle Pain                                      |       |     |
| Backache                                         |       |     |
| Sore throat                                      |       |     |
| Sore mouth                                       |       |     |
